# Supplementary material for: Objectively Measured Sitting and Standing in Workers: Cross-Sectional Relationship with Autonomic Cardiac Modulation
Source: MDPI journal article supplement (doi:10.3390/ijerph16040650), 2019-02-22
Supplement: s1 [file s1]

**Table S1.** Descriptive data of nocturnal resting heart rate and heart rate variability ( $n = 490$ ).

|                  | Mean | SD   |
|------------------|------|------|
| Heart rate (bpm) | 56.8 | 7.5  |
| SDNN (ms)        | 55.9 | 22.5 |
| RMSSD (ln)       | 3.8  | 0.6  |
| HF (ln)          | 6.3  | 1.2  |
| LF (ln)          | 6.5  | 0.9  |

Abbreviations: RMSSD, root mean squared successive differences between R-R intervals; SDNN, standard deviation of R-R intervals; LF, low frequency power; HF, high frequency power.

**Table S2.** Association between standing time (h/day) and nocturnal resting heart rate and heart rate variability, stratified by age. Adjusted model<sup>a</sup> ( $n = 490$ ).

|                                | <45 years ( $n = 196$ ) |               |      | ≥45 years ( $n = 294$ ) |               |      |
|--------------------------------|-------------------------|---------------|------|-------------------------|---------------|------|
|                                | B                       | 95% CI        | p    | B                       | 95% CI        | p    |
| <b>Standing at work</b>        |                         |               |      |                         |               |      |
| Heart rate (bpm)               | -0.86                   | -1.75 to 0.03 | 0.06 | -0.55                   | -1.32 to 0.21 | 0.15 |
| SDNN (ms)                      | 1.76                    | -1.27 to 4.80 | 0.25 | 0.86                    | -1.20 to 2.93 | 0.41 |
| RMSSD (ln)                     | 0.05                    | -0.02 to 0.11 | 0.17 | 0.04                    | -0.02 to 0.09 | 0.20 |
| HF (ln)                        | 0.09                    | -0.05 to 0.22 | 0.21 | 0.08                    | -0.03 to 0.19 | 0.17 |
| LF (ln)                        | 0.08                    | -0.03 to 0.19 | 0.14 | 0.01                    | -0.08 to 0.10 | 0.84 |
| <b>Standing during leisure</b> |                         |               |      |                         |               |      |
| Heart rate (bpm)               | 0.61                    | -0.97 to 2.19 | 0.45 | 0.43                    | -0.93 to 1.78 | 0.54 |
| SDNN (ms)                      | -0.22                   | -5.60 to 5.17 | 0.94 | 3.82                    | 0.15 to 7.49  | 0.04 |
| RMSSD (ln)                     | -0.07                   | -0.18 to 0.05 | 0.27 | 0.03                    | -0.07 to 0.12 | 0.59 |
| HF (ln)                        | -0.14                   | -0.38 to 0.11 | 0.27 | 0.06                    | -0.14 to 0.26 | 0.54 |
| LF (ln)                        | 0.08                    | -0.11 to 0.26 | 0.42 | 0.13                    | -0.02 to 0.28 | 0.10 |

<sup>a</sup> Adjusted for age, gender, body mass index, smoking and moderate-to-vigorous physical activity during leisure. Abbreviations: RMSSD, root mean squared successive differences between R-R intervals; SDNN, standard deviation of R-R intervals; LF, low frequency power; HF, high frequency power.

**Table S3.** Association between standing time (h/day) and nocturnal resting heart rate and heart rate variability stratified by occurrence of cardiovascular disease (CVD). Adjusted model<sup>a</sup> ( $n = 489$ ).

|                                | No CVD ( $n = 259$ ) |               |      | CVD ( $n = 230$ ) |               |      |
|--------------------------------|----------------------|---------------|------|-------------------|---------------|------|
|                                | B                    | 95% CI        | p    | B                 | 95% CI        | p    |
| <b>Standing at work</b>        |                      |               |      |                   |               |      |
| Heart rate (bpm)               | -0.54                | -1.26 to 0.18 | 0.14 | -0.79             | -1.72 to 0.14 | 0.09 |
| SDNN (ms)                      | 0.27                 | -2.15 to 2.69 | 0.83 | 1.98              | -0.48 to 4.44 | 0.11 |
| RMSSD (ln)                     | 0.03                 | -0.03 to 0.09 | 0.29 | 0.04              | -0.02 to 0.10 | 0.21 |
| HF (ln)                        | 0.07                 | -0.04 to 0.19 | 0.22 | 0.07              | -0.07 to 0.20 | 0.33 |
| LF (ln)                        | 0.02                 | -0.08 to 0.11 | 0.74 | 0.07              | -0.04 to 0.17 | 0.22 |
| <b>Standing during leisure</b> |                      |               |      |                   |               |      |
| Heart rate (bpm)               | 0.74                 | -0.54 to 2.02 | 0.26 | 0.02              | -1.68 to 1.71 | 0.98 |
| SDNN (ms)                      | 0.60                 | -3.69 to 4.90 | 0.78 | 4.11              | -0.38 to 8.60 | 0.07 |
| RMSSD (ln)                     | -0.08                | -0.18 to 0.02 | 0.11 | 0.08              | -0.03 to 0.20 | 0.17 |
| HF (ln)                        | -0.14                | -0.35 to 0.06 | 0.17 | 0.15              | -0.09 to 0.39 | 0.21 |
| LF (ln)                        | 0.09                 | -0.06 to 0.25 | 0.24 | 0.13              | -0.05 to 0.31 | 0.17 |

<sup>a</sup> Adjusted for age, gender, body mass index, smoking and moderate-to-vigorous physical activity during leisure. Abbreviations: RMSSD, root mean squared successive differences between R-R intervals; SDNN, standard deviation of R-R intervals; LF, low frequency power; HF, high frequency power.
